# Supplementary material
Source: Springer Nature journal article supplement (https://www.springerprofessional.de/resource/supplementary/13638_2012_556_MOESM8_ESM.pdf/11897948)
Supplement: MOESM8 [file 11897948]

$\lambda_{ij}$  (Where the transmission is from state  $i$  to state  $j$ )

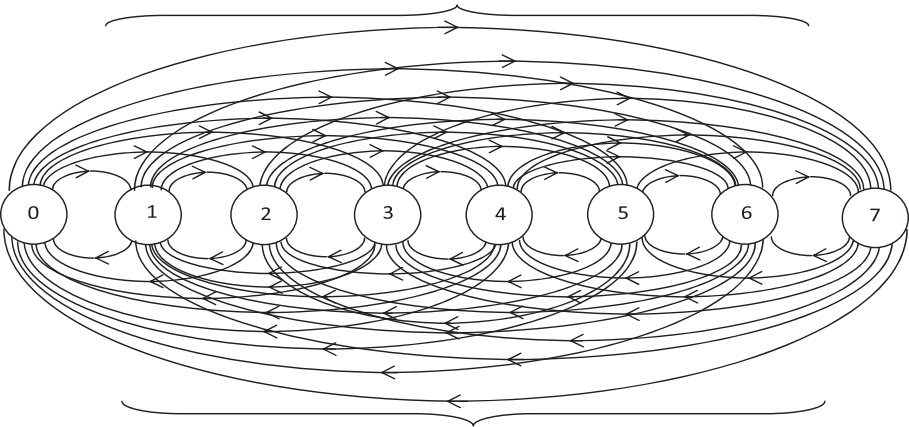

$\mu_{ij}$  (Where the transmission is from state  $i$  to state  $j$ )
